# Supplementary material for: Studying the biology of cytotoxic T lymphocytes in vivo with a fluorescent granzyme B-mTFP knock-in mouse
Source: eLife. 2020 Jul 22;9:e58065. doi: 10.7554/eLife.58065 (PMC7375811; doi:10.7554/eLife.58065)
Supplement: Source data 1. [file elife-58065-data1.xlsx]

## Sheet: Figure 1
Figure 1C
GzmB	mean intensity (a.u)		mTFP	mean intensity (a.u)
Wt Day 4	163326		Wt Day 4	23.70
Wt Day 5	160775		Wt Day 5	29
GzmB Day 4	80258		GzmB Day 4	81.83
GzmB Day 5	86317		GzmB Day 5	109.65
			Blank (because this blot had some background and wt lanes are equal to background)	29.32
GAPDH	mean intensity (a.u)
Wt Day 4	89.88
Wt Day 5	117.26
GzmB Day 4	132.16
GzmB Day 5	134.00
Figure 1D
GzmB	mean intensity (a.u)		GAPDH	mean intensity (a.u)
Day 5 wt	110.17		Day 5 wt	131.11
Day 0	0.83		Day 0	90.09
Day 1	21.85		Day 1	103.74
Day 2	16.15		Day 2	109.78
Day 3	44.36		Day 3	47.42
Day 4	25.34		Day 4	65.92
Day 5	202.61		Day 5	99.15

## Sheet: Figure 2
Figure 2
b
Pearson's Coefficient:	Pearson's Coefficient:
Gzmb-mTFP to Gzmb Ab	Gzmb-mTFP to Perforin
0.8367	0.6867
0.0512728	0.0900371
0.0162139	0.0284722
	n=10
c
	Manders' Coefficients	Manders' Coefficients		Manders' Coefficients	Manders' Coefficients
	Gzmb-mTFP to Gzmb Ab	Gzmb Ab to Gzmb-mTFP		Gzmb-mTFP to perforin	Perforin to Gzmb-mTFP
	0.7934	0.8026		0.6974	0.7116
	0.0663429	0.0311812		0.0676103	0.0871986
	0.0209795	0.00986036		0.0213803	0.0275746
e
poly-0				anti-CD3
	Manders' Coefficients (using threshold value of 827 for imgA and 269 for imgB):		Manders' Coefficients (using threshold value of 827 for imgA and 269 for imgB):		Manders' Coefficients (using threshold value of 827 for imgA and 269 for imgB):
Pearson's Coefficient:	Manders' coefficient sybki overlapping to gzmB	Manders's coefficient gzmB overlapping to sybki		Pearson's Coefficient:	Manders' coefficient sybki overlapping to gzmB	Manders's coefficient gzmB overlapping to sybki
0.88148	0.79448	0.86432		0.861292	0.811708	0.789458
0.098404	0.169735	0.0785937		0.0786613	0.126502	0.128616
		n=25
i
	distance between tubules and CGs (nm)
average	137.545
Stdev	87.5667	cells	no of granules
SEM	19.5805	n=19	80

## Sheet: Figure 3
Figure 3
c				d				e
	Wt	GzmBKI			Wt	GzmBKI		frames	wt	stdev	SEM			GzmB-mTFP	stdev	SEM
	% of secreted cells	% of secreted cells			no of granules fused per cell	no of granules fused per cell		1	1.55594	1.38614	0.438335			1.56697	1.36567	0.394235
EXP1	64.7059	55		EXP1	6.36364	6		100	1.40131	1.22223	0.386502			2.41889	2.34069	0.675698
EXP2	56.6667	51.4286		EXP2	7.94118	8.11111		200	1.35893	1.17155	0.370478			2.40782	2.57291	0.742734
EXP3	55.5556	66.6667		EXP3	6.7	7.6		300	1.82818	1.27984	0.404722			3.19637	3.24109	0.935622
average	58.976	57.6984		average	7.0016	7.23704		400	1.5891	1.23724	0.391248			3.83378	3.26987	0.943929
stdev	4.9932	7.96938		stdev	0.830892	1.10136		500	2.44083	1.75555	0.555154			4.40844	3.0588	0.882998
sem	2.88282	4.60112		sem	0.479716	0.635873		600	2.30639	1.75838	0.556049			4.12114	3.21894	0.929227
								700	2.88255	2.0034	0.633532			5.05022	3.48973	1.0074
	n=65, N=3	n=70, N=3						800	3.1473	2.32225	0.73436			5.39124	3.99223	1.15246
								900	3.93909	2.51685	0.795898			6.19096	3.97355	1.14707
								1000	5.20133	4.9593	1.56827			8.06248	5.62944	1.62508
								1100	5.55879	4.57881	1.44795			8.64098	5.01883	1.44881
								1200	5.02979	3.45463	1.09245			8.36144	4.79206	1.38335
								1300	5.40193	3.25398	1.029			8.51257	4.30844	1.24374
								1400	6.31623	4.10337	1.2976			8.9537	4.52779	1.30706
								1500	7.41973	5.05393	1.59819			9.86983	5.26524	1.51994
								1600	9.2314	6.17249	1.95191			11.5371	5.94843	1.71716
								1700	10.3204	6.31441	1.99679			11.5914	5.87291	1.69536
								1800	11.047	7.12184	2.25212			12.5207	6.57376	1.89768
								1900	11.7483	7.00461	2.21505			13.0491	6.4061	1.84928
								2000	11.5281	6.84875	2.16576			12.706	6.16724	1.78033
								2100	12.6425	7.27697	2.30118			14.073	6.4988	1.87604
								2200	14.1296	7.43316	2.35057			15.0438	6.74038	1.94578
								2300	13.5727	7.46233	2.35979			15.1865	6.74893	1.94825
								2400	13.6086	7.40723	2.34237			14.4446	6.72886	1.94245
								2500	14.6998	7.71239	2.43887			15.1228	6.9515	2.00672
								2600	17.2103	9.56828	3.02575			16.1755	8.60529	2.48413
								2700	17.1888	8.42563	2.66442			16.4777	7.21764	2.08355
								2800	16.0598	7.05971	2.23248			15.5374	6.00013	1.73209
								2900	16.4587	7.44257	2.35355			15.8736	5.98049	1.72642
								3000	16.9005	8.0398	2.54241			16.5346	7.17528	2.07132
								3100	16.9861	7.88943	2.49486			15.3393	5.90691	1.70518
								3200	18.1121	9.67099	3.05824			15.9676	6.18441	1.78528
								3300	18.1328	8.67807	2.74425			16.1612	6.50788	1.87866
								3400	17.0282	8.11806	2.56715			16.2366	6.74958	1.94843
								3500	17.9576	9.01259	2.85003			17.394	7.53503	2.17518
								3600	17.4707	8.93607	2.82583			16.7762	7.23891	2.08969
								3700	16.7739	9.99682	3.16127			16.1004	7.12947	2.0581
								3800	17.4224	9.98374	3.15714			16.1781	7.6502	2.20842
								3900	17.5524	8.7015	2.75166			16.6992	7.45079	2.15086
								4000	18.1427	10.019	3.1683			17.3326	8.63193	2.49182
								4100	17.3912	9.32092	2.94753			16.4068	7.94491	2.2935
								4200	16.2596	10.0474	3.17726			16.4426	8.93256	2.57861

## Sheet: Figure 4
Figure 4
c
wt-day 3
% of LAMP1-PE
control	constitutive	CD3e
0.26	21.04	86
wt-day 5
% of LAMP1-PE
control	constitutive	CD3e
0.24	21.4	86.1
wt-day 7
% of LAMP1-PE
control	constitutive	CD3e
0	0.82	88.5
d
GzmB-mTFP-day 3
% of LAMP1-PE
control	constitutive	CD3e
0.29	22.3	82.87
GzmB-mTFP-day 5
% of LAMP1-PE
control	constitutive	CD3e
0.23	21.3	82.7
GzmB-mTFP-day 7
% of LAMP1-PE
control	constitutive	CD3e
0	0.24	85.7
